# Supplementary material
Source: Springer Nature journal article supplement (https://www.springermedizin.de/resource/supplementary/12891_2013_1998_MOESM2_ESM.pdf/9509338)

27 items for the  
Panel Experts

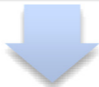

11 items for the  
Factor Analysis

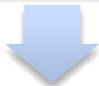

7 items for the Final  
Questionnaire

Supplement: MOESM2 [file 9509338]
